# Supplementary material for: Rapid identification and recovery of ENU-induced mutations with next-generation sequencing and Paired-End Low-Error analysis
Source: PubMed Central journal article supplement (PMC4457992; doi:10.1186/s12864-015-1263-4), 2015-02-14

Difference Curve

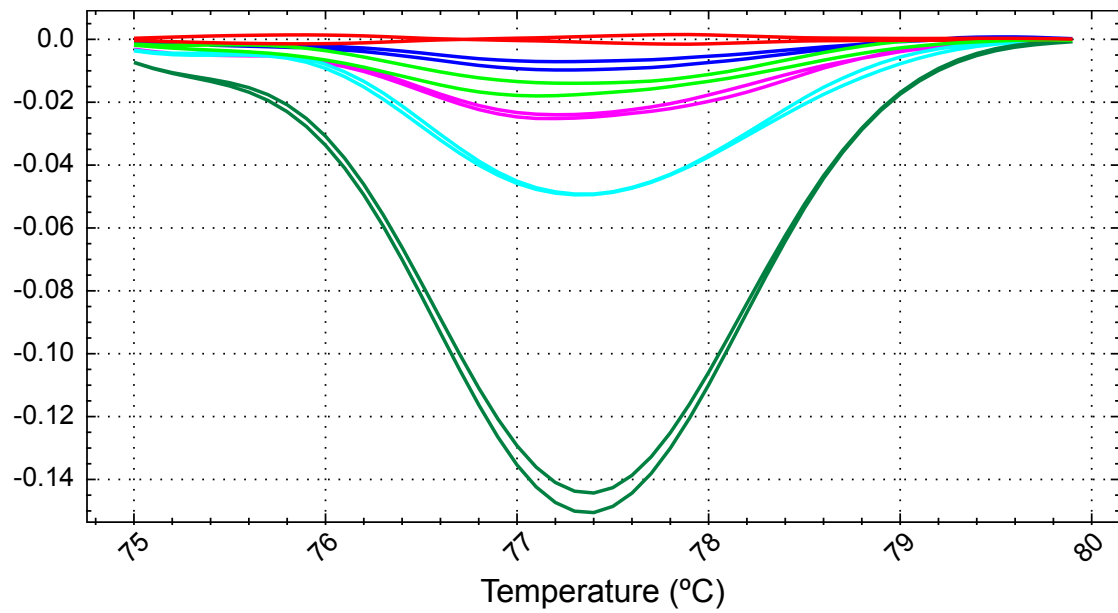

Supplement: 12864_2015_1263_MOESM7_ESM.pdf [file 12864_2015_1263_MOESM7_ESM.pdf]
